## Gene expression

# AQUARIUM: accurate quantification of circular isoforms using model-based strategy

Guoxia Wen<sup>1,†</sup>, Musheng Li<sup>2,†</sup>, Fuyu Li<sup>1</sup>, Zengyan Yang<sup>1</sup>, Tong Zhou<sup>2,\*</sup> and Wanjun Gu<sup>1,3,4,\*</sup>

<sup>1</sup>State Key Laboratory of Bioelectronics, School of Biological Sciences and Medical Engineering, Southeast University, Nanjing, Jiangsu 210096, China, <sup>2</sup>Department of Physiology and Cell Biology, University of Nevada, Reno School of Medicine, Reno, Nevada 89557, USA, <sup>3</sup>Collaborative Innovation Center of Jiangsu Province of Cancer Prevention and Treatment of Chinese Medicine, Nanjing, Jiangsu 210023, China and <sup>4</sup>School of Artificial Intelligence and Information Technology, Nanjing University of Chinese Medicine, Nanjing, Jiangsu 210023, China

\*To whom correspondence should be addressed.

†The authors wish it to be known that, in their opinion, the first two authors should be regarded as Joint First Authors.

Associate Editor: Valentina Boeva

Received on March 5, 2021; revised on May 11, 2021; editorial decision on June 5, 2021; accepted on June 8, 2021

## Abstract

**Summary:** Currently, most computational methods estimate the expression of circular RNAs (circRNAs) using the number of sequencing reads that support back-splicing junctions (BSJ) in RNA-seq data, which may introduce biased estimation of circRNA expression due to the uneven distribution of sequencing reads. To overcome this, we previously developed a model-based strategy for circRNA quantification, enabling consideration of sequencing reads from the entire transcript. Yet, the lack of exact transcript structure of circRNAs may limit its accuracy. Here, we proposed a substantially improved circRNA quantification tool, *AQUARIUM*, by introducing the full-length RNA structure of circular isoforms. We assessed its performance in circRNA quantification using both biological and simulated rRNA-depleted RNA-seq datasets, and demonstrated its superior performance at both BSJ and isoform level.

**Availability and implementation:** *AQUARIUM* is freely available at <https://github.com/wanjun-group-seu/AQUARIUM>.

**Contact:** tongz@med.unr.edu or wanjungu@seu.edu.cn

**Supplementary information:** [Supplementary data](#) are available at *Bioinformatics* online.

## 1 Introduction

Circular RNAs (circRNAs) are a group of non-canonical RNAs with important biological functions (Chen, 2020), and their aberrant expression is related to many diseases (Wen *et al.*, 2020). Thus, the precise estimation of circRNA expression from ribosomal RNA (rRNA)-depleted RNA-seq data is crucial in circRNA-related biomedical research (Gao and Zhao, 2018). Recent studies have developed several computational tools to estimate the abundance of circRNAs, including *CIRI2* (Gao *et al.*, 2018), *KNIFE* (Szabo *et al.*, 2015), *CIRCexplorer2* (Zhang *et al.*, 2016), *CLEAR* (Ma *et al.*, 2019), *CircAST* (Wu *et al.*, 2020), *seekCRIT* (Chaabane *et al.*, 2020) and *CIRIquant* (Zhang *et al.*, 2020). All these tools quantified circRNA expression by counting the number of sequencing reads that support back-splicing junctions (BSJ). However, sequencing reads are not evenly distributed along with both linear and circular transcripts in high-throughput sequencing (Wu *et al.*, 2011).

Therefore, using the number of sequencing reads that cross BSJ sites to represent the expression of circular transcripts may cause biased estimation of circRNA expression, which would be even more concerned, given that most circRNAs are expressed at relatively low levels (Guo *et al.*, 2014). In our previous study, we proposed a model-based quantification strategy, *Sailfish-cir*, to quantify circRNA expression (Li *et al.*, 2017). *Sailfish-cir* transforms circular transcripts to pseudo-linear transcripts and quantifies circRNA expression using sequencing reads that are originated from the entire transcript, rather than BSJ only (Li *et al.*, 2017). The estimation accuracy of *Sailfish-cir* is quite dependent on the exact structure of circRNA transcript. However, it is largely unknown regarding the full-length sequence information of most circRNAs identified by existing identification tools, such as *CIRI* (Gao *et al.*, 2015), which may, to some extent, limit the performance of *Sailfish-cir* (Zhang *et al.*, 2020). In three recent studies, Zheng *et al.* (2019), Xin *et al.* (2021) and Zhang *et al.* (2021) have investigated the transcript

structure of circRNAs and partially addressed the problem of full-length circRNA reconstruction. Zheng *et al.* (2019) presented a computational approach, *CIRI-full*, for effective reconstruction of full-length circRNAs from short-read RNA-seq dataset. Instead, Xin *et al.* (2021) and Zhang *et al.* (2021) experimentally determined the full-length sequences of circRNAs using rolling circle amplification and Nanopore long-read sequencing strategy. Based on these advances, we proposed a state-of-the-art model-based circRNA quantification pipeline, *AQUARIUM* (Accurate QUAntification of circular Isoforms Using Model-based strategy), by introducing full-length sequences and exact exonic structures of circRNA isoforms. We evaluated the performance of *AQUARIUM* on circRNA quantification at the BSJ and isoform level in both biological and simulated RNA-seq datasets. Our results demonstrated that *AQUARIUM* can substantially improve the accuracy of circRNA quantification and deliver better performance compared with the existing count-based tools.

## 2 Overview

### 2.1 Aquarium procedures

Unlike *Sailfish-cir* (Li *et al.*, 2017), *AQUARIUM* integrated sequence and exonic structure of full-length circRNA isoforms from *CIRI-full* output (Zheng *et al.*, 2019), rather than the BSJ information from *CIRI* output (Gao *et al.*, 2015), to quantify the expression of both circular and linear transcripts from rRNA-depleted RNA-seq datasets (Fig. 1A). First, a set of circRNA reference sequences was compiled using *CIRI-full* circRNA identification and reconstruction. For the circRNA isoforms that are identified as the full-length transcript, the complete reconstructed sequences from *CIRI-full* output were used as the reference templates. For the circRNA isoforms that are not completely characterized by *CIRI-full*, the reconstructed partial sequences from *CIRI-full* output and all the exonic sequences in the un-reconstructed regions were joined as the reference sequences. For the circRNAs with BSJ information only, all the known exonic sequences between the BSJ sites were concatenated as the putative references. Next, circular transcripts were transformed to pseudo-linear transcripts as we performed in *Sailfish-cir* (Li *et al.*, 2017). Then, the transformed pseudo-linear reference sequences and all the known linear RNA reference sequences from genomic annotation were merged together as the reference transcripts. Finally, *Salmon* (Patro *et al.*, 2017) was used to simultaneously quantify the expression of both circular and linear transcripts from the RNA-seq data.

### 2.2 Applications

We evaluated the performance of *AQUARIUM* in both the biological and simulated rRNA-depleted RNA-seq datasets (Supplementary Methods). In the biological RNA-seq dataset, the estimation of *AQUARIUM* was highly correlated with the expression values experimentally determined by RT-qPCR ( $n=78$ ;  $r = -0.883$  and  $P = 1.0 \times 10^{-26}$ ) in 11 human fetal tissues at different developmental time points (Szabo *et al.*, 2015) (Fig. 1B). More encouragingly, in comparison to the existing computational tools that quantify circRNA expression at the BSJ level, i.e. *CIRIquant*, *CIRI2*, *CIRI-full*, *CLEAR* and *KNIFE*, the *AQUARIUM* estimates exhibited the highest consistency with the RT-qPCR readouts (Fig. 1B), while the count-based tools had the relatively lower accuracy in circRNA quantification (Fig. 1B and Supplementary Fig. S1). The superior performance of *AQUARIUM* was observed in the simulated RNA-seq datasets as well (Supplementary Fig. S2). Comparing to *Sailfish-cir*, *AQUARIUM* substantially increased its estimation accuracy by using full-length circular transcripts (Supplementary Fig. S3). Furthermore, we found that the concordance between the reference transcripts used in *AQUARIUM* and the simulated circular transcripts (Supplementary Fig. S3 and Supplementary Fig. S4) is the major factor affecting the estimation accuracy, rather than the sequencing depth (15 M, 30 M and 60 M reads) (Supplementary Fig. S2) and read length (PE100, PE150 and PE250) (Supplementary Fig. S5). This is mainly due to the non-uniform distribution of sequencing reads along with the circular transcripts (Supplementary Fig. S6). In addition to the quantification of circular transcripts at the BSJ level, we also examined the performance of *AQUARIUM* in estimating circRNA expressions at the isoform level. Using an rRNA-depleted RNA-seq data of human HeLa cell line (Zheng *et al.*, 2019), we found that the expression of the circRNA isoforms quantified by *AQUARIUM* was significantly correlated with the RT-qPCR readouts ( $n=12$ ;  $r = -0.828$  and  $P = 8.9 \times 10^{-4}$ ), which outperformed the *CIRI-full* tool (Supplementary Fig. S7A). The similar results were observed in the simulated RNA-seq data, in which 109 alternatively spliced circular isoforms were included along with *AQUARIUM* showing a superior quantification accuracy compared with *CIRI-full* (Supplementary Fig. S7B).

### 2.3 Availability and implementation

*AQUARIUM* is implemented using *Python* scripts, which is freely accessible at <https://github.com/wanjun-group-seu/AQUARIUM>.

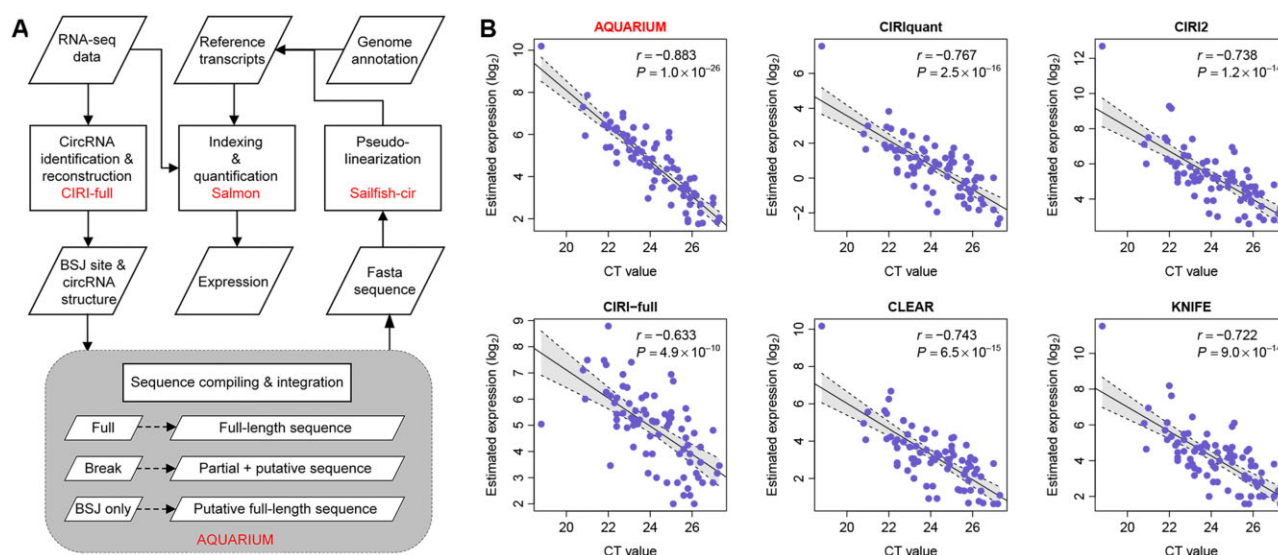

Fig. 1. (A) The *AQUARIUM* workflow to estimate expression values of both circular isoforms and linear RNA transcripts from rRNA-depleted RNA-seq data. (B) Comparison of the quantification performance between the *AQUARIUM*, *CIRIquant*, *CIRI2*, *CIRI-full*, *CLEAR* and *KNIFE*. X-axis and Y-axis represent the circRNA expression measured by RT-qPCR and the estimated circRNA expression by each tool from RNA-seq data ( $\log_2$ -transformed), respectively. The expression data were recorded as TPM for *AQUARIUM*, CPM for *CIRIquant*, FPB<sub>circ</sub> for *CLEAR* and number of BSJ reads for *CIRI2*, *CIRI-full* and *KNIFE*. The  $r$  and  $P$  were computed by Pearson correlation test between X- and Y-axes

The scripts to generate the simulation data, along with the simulated RNA-seq datasets were also available at <https://github.com/wanjun-group-seu/AQUARIUM>.

### 3 Conclusion

We proposed a state-of-the-art computational tool for circRNA quantification by integrating full-length sequence and isoform structure of circular transcripts. The inclusion of full-length circular isoforms substantially increases the estimation accuracy of circRNA expression in our model-based framework, which ensures better performance against the existing count-based algorithms. With more full-length circular isoforms identified by computational algorithms (Zheng *et al.*, 2019) or experimental investigations (Xin *et al.*, 2021; Zhang *et al.*, 2021), AQUARIUM will greatly improve the accuracy of circRNA quantification from RNA-seq data.

### Acknowledgements

The authors thank Dr Fangqing Zhao for kindly sharing the RT-qPCR data in CIRCquant study.

### Funding

This work was funded by grants from the National Key R&D Program of China (2018YFC1314900, 2018YFC1314902 to W.G.), National Natural Science Foundation of China (61571109 to W.G.) and the Fundamental Research Funds for the Central Universities (2242017K3DN04 to W.G.).

*Conflict of Interest:* none declared.

### References

Chaabane, M. *et al.* (2020) seekCRIT: detecting and characterizing differentially expressed circular RNAs using high-throughput sequencing data. *PLoS Comput. Biol.*, **16**, e1008338.

- Chen, L.-L. (2020) The expanding regulatory mechanisms and cellular functions of circular RNAs. *Nat. Rev. Mol. Cell Biol.*, **21**, 475–416.
- Gao, Y. and Zhao, F. (2018) Computational strategies for exploring circular RNAs. *Trends Genet.*, **34**, 389–400.
- Gao, Y. *et al.* (2015) CIRI: an efficient and unbiased algorithm for de novo circular RNA identification. *Genome Biol.*, **16**, 4.
- Gao, Y. *et al.* (2018) Circular RNA identification based on multiple seed matching. *Brief Bioinform.*, **19**, 803–810.
- Guo, J.U. *et al.* (2014) Expanded identification and characterization of mammalian circular RNAs. *Genome Biol.*, **15**, 409.
- Li, M. *et al.* (2017) Quantifying circular RNA expression from RNA-seq data using model-based framework. *Bioinformatics*, **33**, 2131–2139.
- Ma, X.-K. *et al.* (2019) CIRCexplorer3: a CLEAR pipeline for direct comparison of circular and linear RNA expression. *Genome Proteom. Bioinform.*, **17**, 511–521.
- Patro, R. *et al.* (2017) Salmon provides fast and bias-aware quantification of transcript expression. *Nat. Methods*, **14**, 417–419.
- Szabo, L. *et al.* (2015) Statistically based splicing detection reveals neural enrichment and tissue-specific induction of circular RNA during human fetal development. *Genome Biol.*, **16**, 126.
- Wen, G. *et al.* (2020) The potential of using blood circular RNA as liquid biopsy biomarker for human diseases. *Protein Cell*, doi: 10.1007/s13238-020-00799-3.
- Wu, J. *et al.* (2020) CircAST: full-length assembly and quantification of alternatively spliced isoforms in circular RNAs. *Genom. Proteom. Bioinform.*, **17**, 522–534.
- Wu, Z. *et al.* (2011) Using non-uniform read distribution models to improve isoform expression inference in RNA-Seq. *Bioinformatics*, **27**, 502–508.
- Xin, R. *et al.* (2021) isoCirc catalogs full-length circular RNA isoforms in human transcriptomes. *Nat. Commun.*, **12**, 266.
- Zhang, J. *et al.* (2020) Accurate quantification of circular RNAs identifies extensive circular isoform switching events. *Nat. Commun.*, **11**, 90.
- Zhang, J. *et al.* (2021) Comprehensive profiling of circular RNAs with nanopore sequencing and CIRI-long. *Nat. Biotechnol.*, doi: 10.1038/s41587-021-00842-6.
- Zhang, X.-O. *et al.* (2016) Diverse alternative back-splicing and alternative splicing landscape of circular RNAs. *Genome Res.*, **26**, 1277–1287.
- Zheng, Y. *et al.* (2019) Reconstruction of full-length circular RNAs enables isoform-level quantification. *Genome Med.*, **11**, 2.
